# Supplementary material for: A bilayer triangular lattice with crown-like Co7 spin cluster SBUs exhibiting high spin frustration
Source: Royal Society of Chemistry journal article supplement (doi:10.1039/c4cc02910k), 2014-01-01
Supplement: c4cc02910k1.pdf [file c4cc02910k1.pdf]

## Electronic Supplementary Information

### A Bilayer Triangular Lattice with Crown-like Co<sub>7</sub> Spin Cluster SBUs Exhibiting High Spin Frustration

Ya-Min Li,<sup>\*a</sup> Hui-Jie Lun,<sup>a</sup> Chang-Yu Xiao,<sup>a</sup> Yan-Qing Xu,<sup>b</sup> Ling Wu,<sup>c</sup> Jing-He Yang,<sup>a</sup> Jing-Yang Niu<sup>a</sup> and Sheng-Chang Xiang<sup>\*c</sup>

<sup>a</sup> Henan Key Laboratory of Polyoxometalate; Institute of Molecular and Crystal Engineering,  
College of Chemistry and Chemical Engineering, Henan University, Kaifeng, Henan, 475004,  
China; E-mail: liyamin@henu.edu.cn

<sup>b</sup> School of Chemistry, Key Laboratory of Cluster Science, Ministry of Education of China, Beijing  
Institute of Technology, Beijing, 100081, China

<sup>c</sup> Fujian Provincial Key Laboratory of Polymer Materials, College of Chemistry and Chemical  
Engineering, Fujian Normal University, Fuzhou, Fujian, 350007, China; E-mail:  
scxiang@fjnu.edu.cn

## 17 Experimental Section

### 18 Materials and Physical Measurements

19 All materials were commercially available and used as received. Infrared spectrum was recorded  
20 on a Nicolet magna 750 FT-IR spectrophotometer using KBr pellets in the range of 400~4000 cm<sup>-1</sup>.  
21 Elemental analyses were performed *via* Vario EL III Etro Elemental Analyzer.  
22 Thermogravimetric analysis (TGA) was performed under atmosphere with a heating rate of 10  
23 °C/min<sup>-1</sup> using TGA/SDTA851e. Powder X-ray diffraction (PXRD) pattern was recorded on a  
24 Philips X'PertPro instrument with Cu *Kα* radiation ( $\lambda = 1.54056 \text{ \AA}$ ) in the range  $2\theta = 5\text{--}50^\circ$  at  
25 room temperature. Magnetic measurements were carried out on a Quantum Design MPMS-XL  
26 SQUID magnetometer, and diamagnetic corrections were estimated from Pascal's constants.

### 27 Synthesis of $[\{\text{Co}_7(\text{OH})_6(1,4\text{-npa})_4(\text{H}_2\text{O})_3\}(\text{dmt})_{0.5}\cdot 4\text{H}_2\text{O}]_n$ (**1**)

28 A mixture of CoCl<sub>2</sub>·6H<sub>2</sub>O (0.476 g, 2 mmol), 1,4-npa (0.216 g, 1 mmol) and dmt (0.125 g, 1  
29 mmol), and H<sub>2</sub>O (10 mL) was placed in a Teflon-lined stainless steel vessel, heated to 150 °C for  
30 3 days, then cooled to room temperature. Red crystals of **1** were obtained, washed by H<sub>2</sub>O (Yield:  
31 0.086 g, 22.3 % based on 1,4-npa). Elemental analysis (%): calcd for C 38.50, H 3.07, N 2.24;  
32 found C 38.47, H 3.46, N 2.35.

### 33 Crystallographical Section

34 X-ray single crystal data were collected at 113.15 K on a MERCURY-CCD areadetector  
35 diffractometer with Mo *Kα* radiation ( $\lambda = 0.71073 \text{ \AA}$ ). Data reduction and absorption correction  
36 were made with multi-scan methods. These structures were solved by direct methods using  
37 SHELXS-97<sup>1</sup> and refined by full matrix least-squares methods using SHELXL-97<sup>2</sup>. Anisotropic  
38 displacement parameters were refined for non-hydrogen atoms except O8, O9, O8A, O9A, C12A,  
39 C13A, C31 and C31A. Crystal data for Co<sub>7</sub>C<sub>50</sub>H<sub>47.5</sub>N<sub>2.5</sub>O<sub>29</sub>,  $M_r = 1559.92$ , trigonal, space group  
40  $R\bar{3}$ ,  $a = 14.997(3) \text{ \AA}$ ,  $b = 14.997(3) \text{ \AA}$ ,  $c = 52.244(16) \text{ \AA}$ ,  $\gamma = 120^\circ$ ,  $V = 10176 \text{ \AA}^3$ ,  $T = 113.15 \text{ K}$ ,  
41  $Z = 6$ ,  $\mu = 1.749 \text{ mm}^{-1}$ ,  $\rho = 1.527 \text{ g/cm}^{-3}$ ,  $S = 1.048$ ,  $R = 0.0650$ , and  $wR = 0.1912$  for independent  
42 reflections 3694 [ $I > 2\sigma(I)$ ]. Due to high symmetry, two 1,4-naphthalic acid ligands are disordered  
43 and treated as two parts. The disordered guest molecule (2,4-diamine-6-methyl-triazine) or  
44 solvents in the lattice pores could not be modeled in terms of atomic sites and were treated using  
45 the SQUEEZE routine<sup>3</sup> in the PLATON software package<sup>4</sup>. However, due to the addition of the  
46 guest and solvent molecules to the SFAC and UNIT list, the cell content didn't agree, accordingly,  
47 Alert level A "CHEMW03\_ALERT\_2\_A ALERT: The ratio of given/expected molecular weight

as calculated...” appeared. Crystal data and refinement details are presented in Table S1. Selected bond distances and bond angles are listed in Table S2.

**Table S1** Crystallographic data for compound **1**.

| <b>1</b>                                    |                                                                                    |
|---------------------------------------------|------------------------------------------------------------------------------------|
| Empirical formula                           | C <sub>50</sub> H <sub>47.5</sub> Co <sub>7</sub> N <sub>2.5</sub> O <sub>29</sub> |
| Formula weight                              | 1559.92                                                                            |
| Crystal system                              | trigonal                                                                           |
| Space group                                 | <i>R</i> -3                                                                        |
| Unit cell dimensions                        |                                                                                    |
| <i>a</i> (Å)                                | 14.997(3)                                                                          |
| <i>b</i> (Å)                                | 14.997(3)                                                                          |
| <i>c</i> (Å)                                | 52.244(16)                                                                         |
| <i>γ</i> (°)                                | 120                                                                                |
| <i>V</i> (Å <sup>3</sup> )                  | 10176(4)                                                                           |
| <i>Z</i>                                    | 6                                                                                  |
| <i>ρ</i> calcd.(Mg/m <sup>3</sup> )         | 1.527                                                                              |
| <i>μ</i> (mm <sup>-1</sup> )                | 1.749                                                                              |
| <i>F</i> (000)                              | 4716                                                                               |
| <i>θ</i> limits (°)                         | 2.96 to 25                                                                         |
| <i>h, k, l</i> limits                       | −17 to 17, −17 to 17, −58 to 62                                                    |
| Reflections collected / unique              | 22014 / 3694 [ <i>R</i> (int) = 0.0232]                                            |
| Data / restraints / parameters              | 3952 / 655 / 432                                                                   |
| GOOF                                        | 1.084                                                                              |
| <i>R</i> index [ <i>I</i> > 2σ( <i>I</i> )] | <i>R</i> <sub>1</sub> = 0.0650, <i>wR</i> <sub>2</sub> = 0.1912                    |
| <i>R</i> (all data)                         | <i>R</i> <sub>1</sub> = 0.0672, <i>wR</i> <sub>2</sub> = 0.1941                    |
| Largest and mean delta/sigma                | 0.001/0.000                                                                        |

$$R = \sum(|F_o| - |F_c|) / \sum|F_o|, wR = \{ \sum w[(F_o^2 - F_c^2)^2] / \sum w[(F_o^2)^2] \}^{1/2}, w = 1 / [\sigma^2(F_o^2) + (aP)^2 + bP], P = (F_o^2 + 2F_c^2) / 3, a = 0.1275, b = 107.5097.$$

56

**Table S2** Selected bond lengths [Å] and angles [°] for compound **1**.

| Bond length [Å]   |            |                      |            |
|-------------------|------------|----------------------|------------|
| Co(1)–O(6)        | 2.048(4)   | Co(2)–O(7)           | 2.090(4)   |
| Co(1)–O(4)        | 2.049(4)   | Co(2)–O(5)           | 2.092(4)   |
| Co(1)–O(9)        | 2.049(4)   | Co(2)–O(3)           | 2.109(4)   |
| Co(1)–O(1)        | 2.077(4)   | Co(2)–O(2)           | 2.261(3)   |
| Co(1)–O(2)        | 2.155(3)   | Co(3)–O(8A)          | 1.983(13)  |
| Co(1)–O(8)#1      | 2.161(12)  | Co(3)–O(8A)#1        | 2.396(12)  |
| Co(1)–Co(3)       | 2.9143(9)  | Co(3)–O(2)           | 2.168(3)   |
| Co(2)–O(1)        | 2.054(3)   |                      |            |
| Bond angles [°]   |            |                      |            |
| O(6)–Co(1)–O(4)   | 86.3(2)    | O(7)–Co(2)–O(2)      | 98.29(14)  |
| O(6)–Co(1)–O(9)   | 80.3(2)    | O(5)–Co(2)–O(2)      | 98.11(14)  |
| O(4)–Co(1)–O(9)   | 80.4(2)    | O(3)–Co(2)–O(2)      | 174.02(13) |
| O(6)–Co(1)–O(1)   | 97.81(16)  | O(2)–Co(3)–O(8)      | 100.7(4)   |
| O(9)–Co(1)–O(1)   | 177.2(2)   | O(8)#3–Co(3)–O(8)#2  | 71.6(6)    |
| O(6)–Co(1)–O(2)   | 177.67(18) | O(8)#3–Co(3)–O(2)#2  | 103.4(4)   |
| O(4)–Co(1)–O(2)   | 94.69(18)  | O(8)#2Co(3)–O(2)#2   | 100.7(4)   |
| O(9)–Co(1)–O(2)   | 97.8(2)    | O(8)–Co(3)–O(2)#2    | 171.7(4)   |
| O(1)–Co(1)–O(2)   | 84.15(11)  | O(8)–Co(3)–O(2)#3    | 103.4(4)   |
| O(1)–Co(2)–O(1)#2 | 98.79(15)  | O(2)#2o(3)–O(2)#3    | 83.89(12)  |
| O(1)–Co(2)–O(7)   | 171.38(16) | O(8)#3–Co(3)–O(2)    | 171.4(4)   |
| O(1)–Co(2)–O(5)   | 90.29(16)  | O(8)#3–Co(3)–O(8A)#4 | 35.0(5)    |
| O(7)–Co(2)–O(5)   | 81.1(2)    | O(8)#2–Co(3)–O(8A)#4 | 98.2(5)    |
| O(1)–Co(2)–O(3)   | 94.04(13)  | O(2)#2–Co(3)–O(8A)#4 | 76.4(4)    |
| O(7)–Co(2)–O(3)   | 86.27(15)  | O(2)#3–Co(3)–O(8A)#4 | 76.0(3)    |
| O(5)–Co(2)–O(3)   | 86.37(15)  | O(2)–Co(3)–O(8A)#4   | 153.1(3)   |
| O(1)–Co(2)–O(2)   | 82.03(11)  |                      |            |

57 Symmetry transformations used to generate equivalent atoms: #1  $-x+y+1, -x-1, z$ ; #2  $2-x, y-2,$   
 58  $1+z$ ; #3  $3+x, 2+y, 2+z$ ; #4  $-x+y, -x, 2+z$ .

59

**Table 3** BVS analyses of Co,  $\mu_3$ -O and  $\mu_4$ -O atoms for compound **1**.

| Atoms      | Co(1)            | Co(2)            | Co(3)            | $\mu_3$ -O(1)   | $\mu_4$ -O(2)   |
|------------|------------------|------------------|------------------|-----------------|-----------------|
| BVS        | 1.970            | 1.969            | 2.148            | 1.104           | 1.134           |
| Assignment | Co <sup>2+</sup> | Co <sup>2+</sup> | Co <sup>2+</sup> | OH <sup>-</sup> | OH <sup>-</sup> |

60 The oxidation state of a particular atom can be taken as the nearest integer to the value.<sup>5</sup>

61

## 62 **Physical Characterization Section**

63 From IR spectra (Fig. S1), the sharp peak at  $3605\text{ cm}^{-1}$  of **1** should be attributed to the  
64 stretching vibration of OH groups, demonstrating the existence of OH group in compound **1**. The  
65 antisymmetric stretching vibration of carboxylic group is assigned to the  $1573\text{ cm}^{-1}$ , while the  
66 symmetric stretching vibration at  $1371\text{ cm}^{-1}$ , which show the bridging mode of carboxylic group.<sup>6</sup>

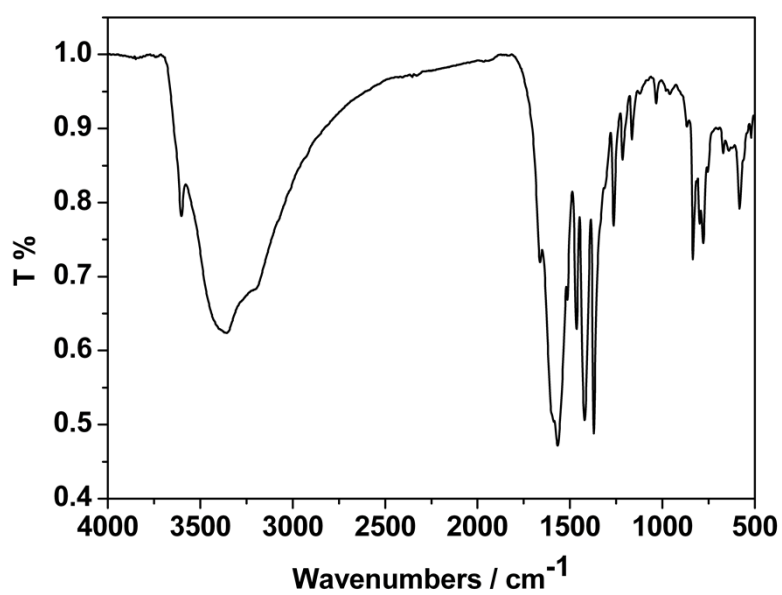

**Fig. S1** IR spectra for the compound 1.

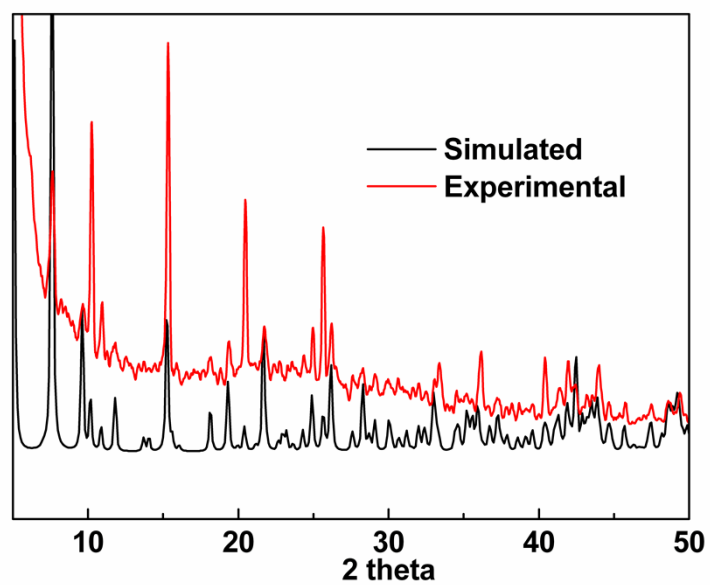

**Fig. S2** PXRD curves for the compound 1.

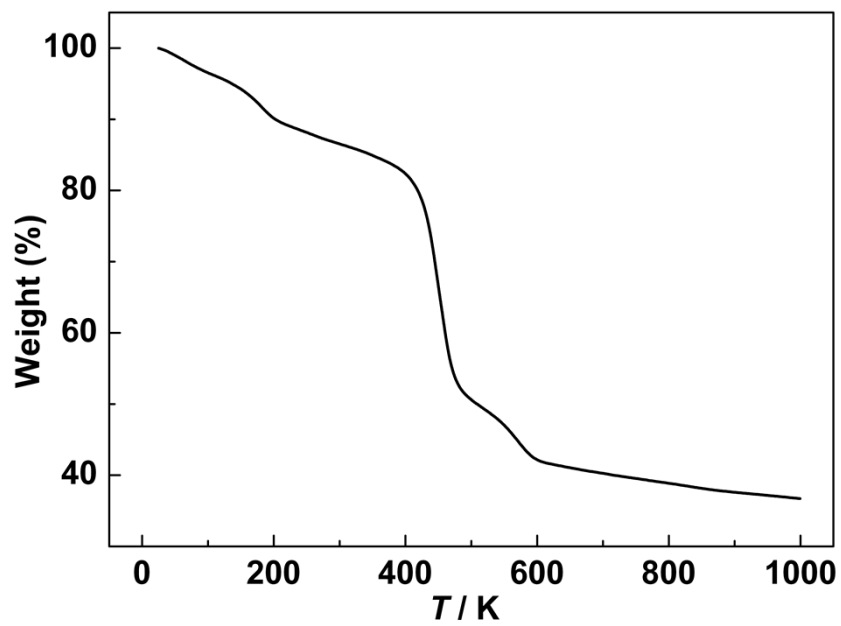

Fig. S3 TGA curve for the compound 1.

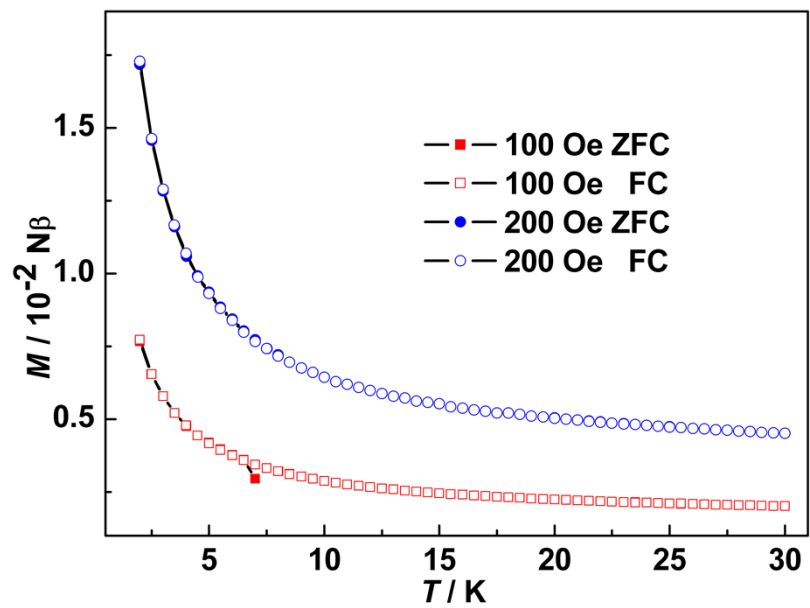

Fig. S4 FCM and ZFCM curves at 100 Oe and 200 Oe for 1.

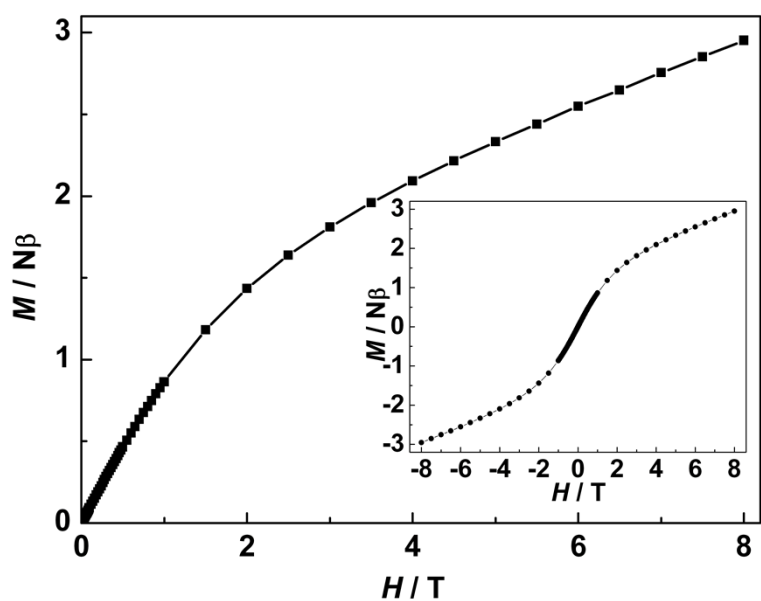

**Fig. S5** The curves of magnetization vs. applied fields at 2 K in **1**.

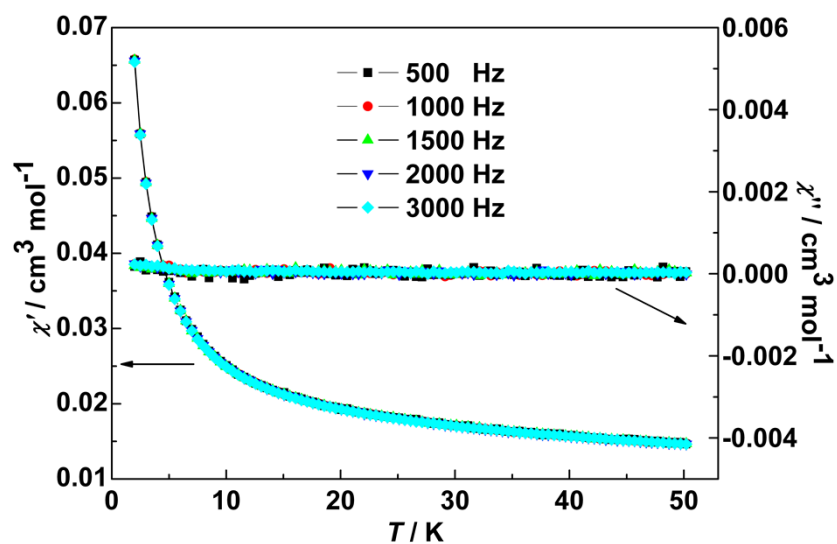

**Fig. S6** Plots of the temperature dependence of the ac susceptibility  $\chi'$  and  $\chi''$  obtained at 3 Oe field for **1**.

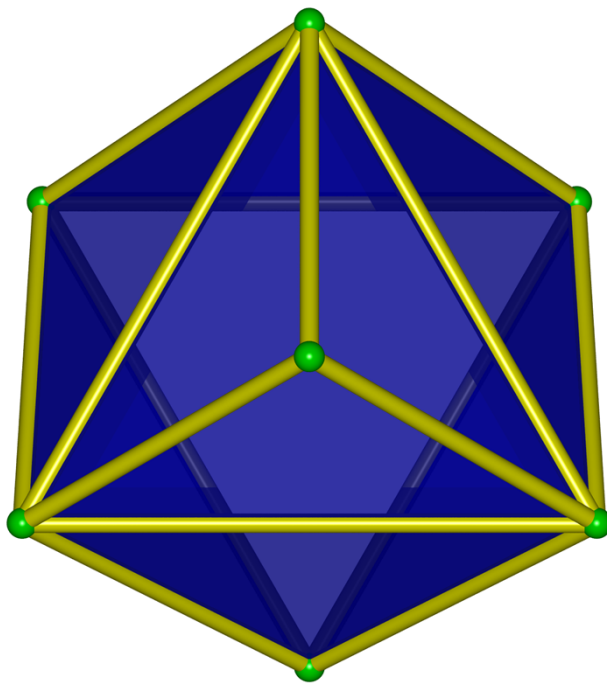

**Fig. S7** The cobalt skeleton highlighting the polyhedron with eleven triangular faces shaded in blue for **1**.

## References

- 1 G. M. Sheldrick, SHELXS-97, *Program for X-ray Crystal Structure Solution*, University of Göttingen, Göttingen, Germany, 1997.
- 2 G. M. Sheldrick, SHELXL-97, *Program for X-ray Crystal Structure Refinement*, University of Göttingen, Göttingen, Germany, 1997.
- 3 P. van der Sluis and A. L. Spek, *Acta Cryst.*, 1990, **A46**, 194–201.
- 4 A. L. Spek, *J. Appl. Cryst.*, 2003, **36**, 7–13.
- 5 I. D. Brown, *Chem. Rev.*, 2009, **109**, 6858–6919.
- 6 (a) X.-J. Li, X.-Y. Wang, S. Gao and R. Cao, *Inorg. Chem.*, 2006, **45**, 1508–1516; (b) T. K. Maji, S. Sain, G. Mostafa, T.-H. Lu, J. Ribas, M. Monfort and N. R. Chaudhuri, *Inorg. Chem.*, 2003, **42**, 709–716; (c) X.-Y. Yi, H.-C. Fang, Z.-G. Gu, Z.-Y. Zhou, Y.-P. Cai, J. Tian and P. K. Thallapally, *Cryst. Growth Des.*, 2011, **11**, 2824–2828.
